# Supplementary material for: Toxicological Impacts of Certain Pesticides on Subtrrenean Termite, Coptotermes alexandrines, and Drywood Termite, Cryptotermes brevis
Source: Research Square preprint supplement (doi:10.21203/rs.3.rs-7443154/v1), 2025-11-29
Supplement: Supplementary file 1 [file 7a015bcd697c80945a7aa3aa.docx]

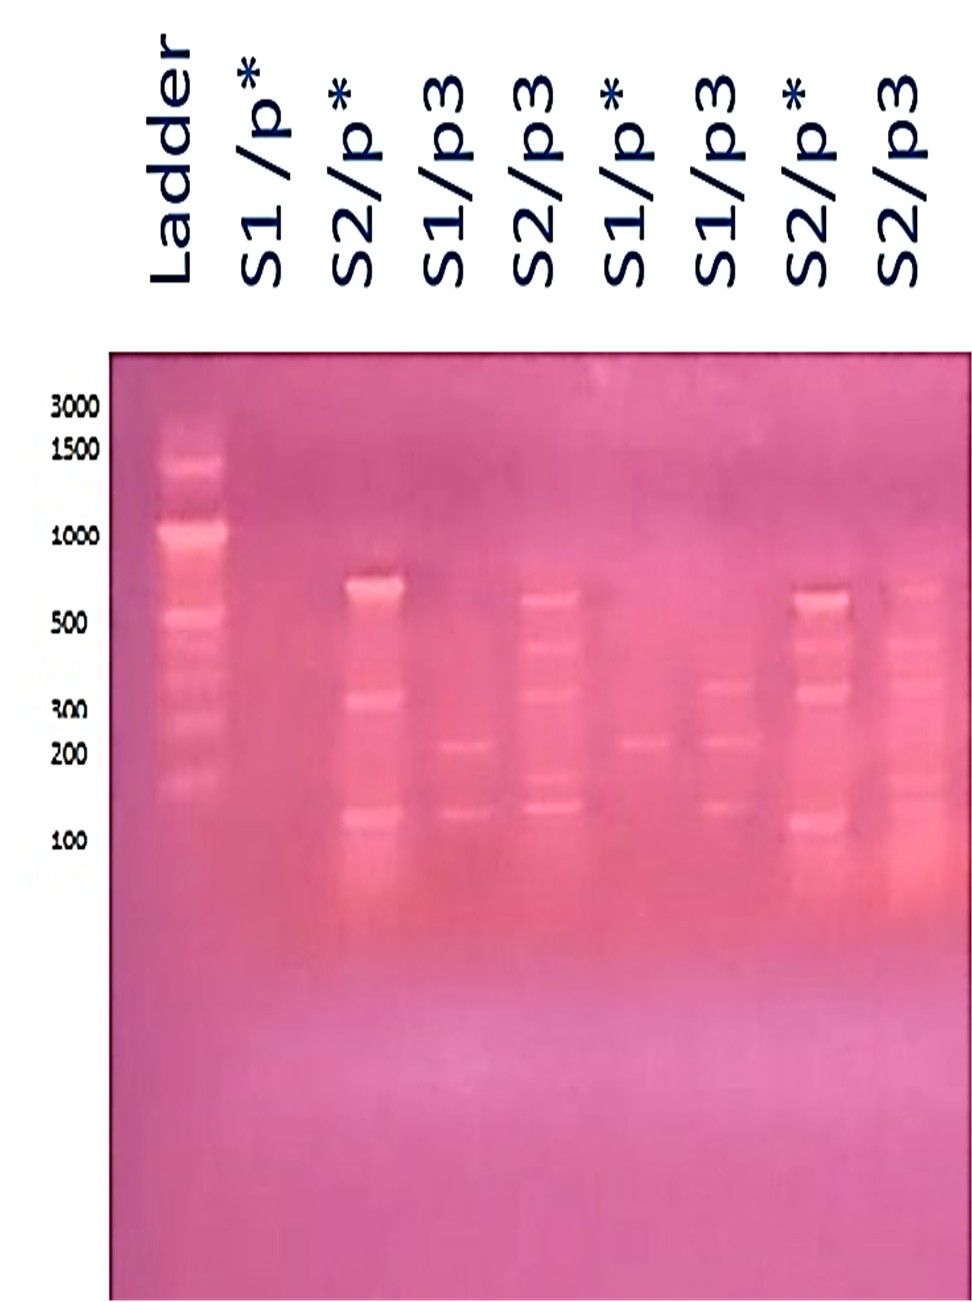


**Supplementary Figure 1S**: Random polymorphic DNA polymerase chain reaction (RAPD-PCR) patterns of 8 *C. alexandrinus* (S1) isolated from soil and *C. brevis* (S2) isolated from wood.
